# Supplementary material for: Assessment of musculoskeletal symptoms and their impacts in the adolescent population: adaptation and validation of a questionnaire
Source: BMC Pediatr. 2014 Jul 3;14:173. doi: 10.1186/1471-2431-14-173 (PMC4107588; doi:10.1186/1471-2431-14-173)
Supplement: Additional file 1 — Teen Nordic Musculoskeletal Screening Questionnaire (TNMQ-S). The additional file 1 is the TNMQ-S questionnaire presented in its validated and final form. [file 1471-2431-14-173-S1.pdf]

# Questionnaire de dépistage des symptômes musculo-squelettiques chez les adolescents

Teen Nordic Musculoskeletal Screening Questionnaire (TNMQ-S)

## COU – NUQUE

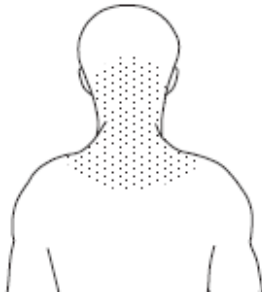

Répondez aux questions suivantes en considérant la région ombragée sur cette image

1. Avez-vous ressenti des symptômes (douleur, élancement, gêne, inconfort) au **COU** et/ou à la **NUQUE** au courant des **6 derniers mois** ?  
Oui ☐ Non ☐ **si non, passez à ÉPAULES**
2. Au courant des **6 derniers mois** : avez-vous manqué une/des journées d'école ou de travail en raison de ce problème?  
Oui ☐ Non ☐
3. Au courant des **6 derniers mois** : avez-vous été contraint à réduire vos activités (sports et loisirs, etc.) en raison de ce problème?  
Oui ☐ Non ☐

## ÉPAULES

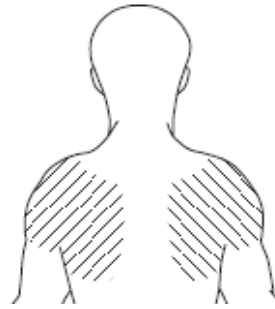

Répondez aux questions suivantes en considérant la région ombragée sur cette image

4. Avez-vous ressenti des symptômes (douleur, élancement, gêne, inconfort) aux **ÉPAULES** au courant des **6 derniers mois** ?  
Oui ☐ Non ☐ **si non, passez à HAUT DU DOS**
5. Au courant des **6 derniers mois** : avez-vous manqué une/des journées d'école ou de travail en raison de ce problème?  
Oui ☐ Non ☐
6. Au courant des **6 derniers mois** : avez-vous été contraint à réduire vos activités (sports et loisirs, etc.) en raison de ce problème?  
Oui ☐ Non ☐

## HAUT DU DOS

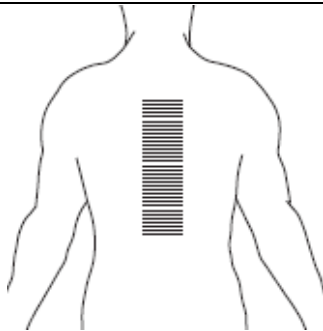

Répondez aux questions suivantes en considérant la région ombragée sur cette image

7. Avez-vous ressenti des symptômes (douleur, élancement, gêne, inconfort) au **HAUT DU DOS** au courant des **6 derniers mois** ?  
Oui ☐ Non ☐ **si non, passez à COUDES**
8. Au courant des **6 derniers mois** : avez-vous manqué une/des journées d'école ou de travail en raison de ce problème?  
Oui ☐ Non ☐
9. Au courant des **6 derniers mois** : avez-vous été contraint à réduire vos activités (sports et loisirs, etc.) en raison de ce problème?  
Oui ☐ Non ☐

## COUDES

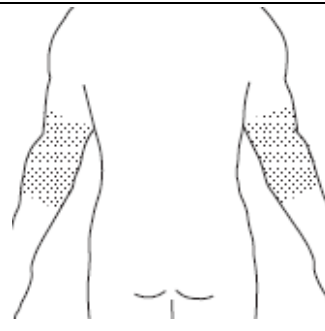

Répondez aux questions suivantes en considérant la région ombragée sur cette image

10. Avez-vous ressenti des symptômes (douleur, élancement, gêne, inconfort) aux **COUDES** au courant des **6 derniers mois** ?  
Oui ☐ Non ☐ **si non, passez à POIGNETS-MAINS (prochaine page)**
11. Au courant des **6 derniers mois** : avez-vous manqué une/des journées d'école ou de travail en raison de ce problème?  
Oui ☐ Non ☐
12. Au courant des **6 derniers mois** : avez-vous été contraint à réduire vos activités (sports et loisirs, etc.) en raison de ce problème?  
Oui ☐ Non ☐

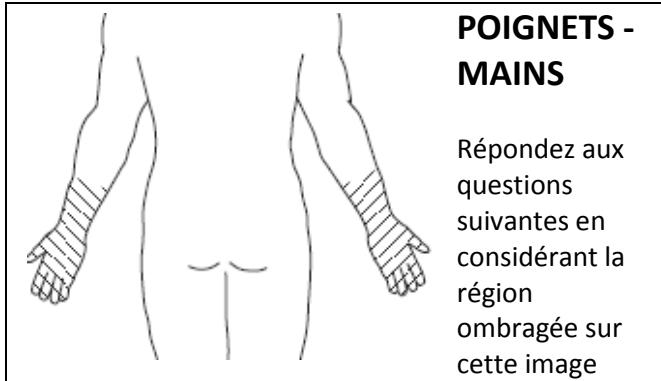

## POIGNETS - MAINS

Répondez aux questions suivantes en considérant la région ombragée sur cette image

13. Avez-vous ressenti des symptômes (douleur, élancement, gêne, inconfort) aux **POIGNETS** et/ou aux **MAINS** au courant des **6 derniers mois** ?  
Oui ☐ Non ☐ **si non, passez à BAS DU DOS**
14. Au courant des **6 derniers mois** : avez-vous manqué une/des journées d'école ou de travail en raison de ce problème ?  
Oui ☐ Non ☐
15. Au courant des **6 derniers mois** : avez-vous été contraint à réduire vos activités (sports et loisirs, etc.) en raison de ce problème ?  
Oui ☐ Non ☐

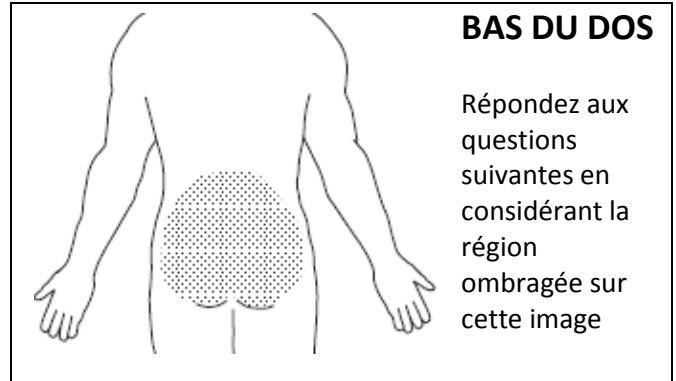

## BAS DU DOS

Répondez aux questions suivantes en considérant la région ombragée sur cette image

16. Avez-vous ressenti des symptômes (douleur, élancement, gêne, inconfort) au **BAS DU DOS** au courant des **6 derniers mois** ?  
Oui ☐ Non ☐ **si non, passez à HANCHES - CUISSSES**
17. Au courant des **6 derniers mois** : avez-vous manqué une/des journées d'école ou de travail en raison de ce problème ?  
Oui ☐ Non ☐
18. Au courant des **6 derniers mois** : avez-vous été contraint à réduire vos activités (sports et loisirs, etc.) en raison de ce problème ?  
Oui ☐ Non ☐

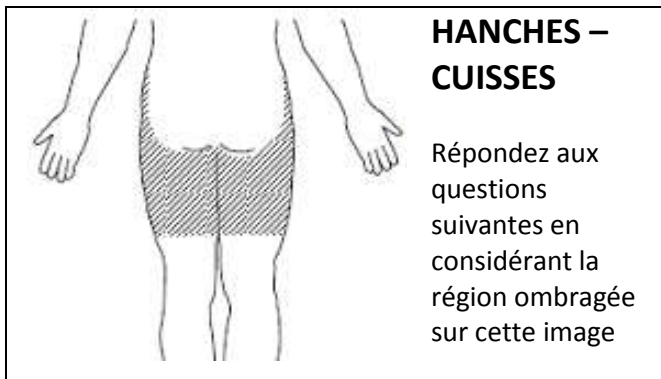

## HANCHES – CUISSSES

Répondez aux questions suivantes en considérant la région ombragée sur cette image

19. Avez-vous ressenti des symptômes (douleur, élancement, gêne, inconfort) aux **HANCHES** et/ou aux **CUISSSES** au courant des **6 derniers mois** ?  
Oui ☐ Non ☐ **si non, passez à GENOUX**
20. Au courant des **6 derniers mois** : avez-vous manqué une/des journées d'école ou de travail en raison de ce problème ?  
Oui ☐ Non ☐
21. Au courant des **6 derniers mois** : avez-vous été contraint à réduire vos activités (sports et loisirs, etc.) en raison de ce problème ?  
Oui ☐ Non ☐

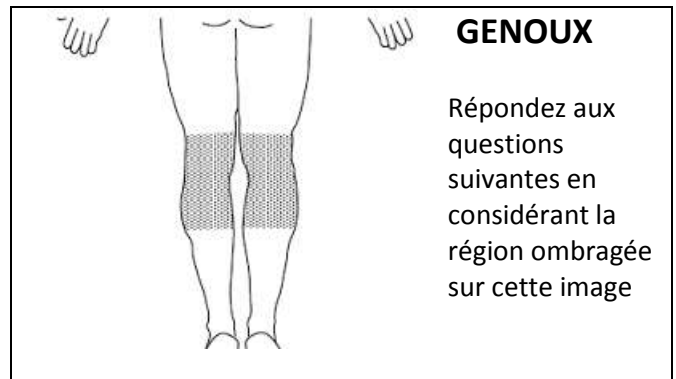

## GENOUX

Répondez aux questions suivantes en considérant la région ombragée sur cette image

22. Avez-vous ressenti des symptômes (douleur, élancement, gêne, inconfort) aux **GENOUX** au courant des **6 derniers mois** ?  
Oui ☐ Non ☐ **si non, passez à CHEVILLES-PIEDS (prochaine page)**
23. Au courant des **6 derniers mois** : avez-vous manqué une/des journées d'école ou de travail en raison de ce problème ?  
Oui ☐ Non ☐
24. Au courant des **6 derniers mois** : avez-vous été contraint à réduire vos activités (sports et loisirs, etc.) en raison de ce problème ?  
Oui ☐ Non ☐

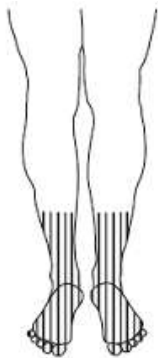

## CHEVILLES - PIEDS

Répondez aux questions suivantes en considérant la région ombragée sur cette image

25. Avez-vous ressenti des symptômes (douleur, élancement, gêne, inconfort) aux **CHEVILLES** et/ou aux **PIEDS** au courant des **6 derniers mois** ?  
Oui ☐ Non ☐ **si non, vous avez terminé**
26. Au courant des **6 derniers mois** : avez-vous manqué une/des journées d'école ou de travail en raison de ce problème?  
Oui ☐ Non ☐
27. Au courant des **6 derniers mois** : avez-vous été contraint à réduire vos activités (sports et loisirs, etc.) en raison de ce problème?  
Oui ☐ Non ☐
